# Supplementary material
Source: ML conference proceedings conference paper supplement (https://proceedings.neurips.cc/paper_files/paper/2019/hash/9b8b50fb590c590ffbf1295ce92258dc-Abstract.html)
Supplement: Supplementary file [file 9b8b50fb590c590ffbf1295ce92258dc-Supplemental.zip]

---

# Regret Bounds for Learning State Representations in Reinforcement Learning

---

Anonymous Author(s)

Affiliation

Address

email

## Abstract

1 We consider the problem of online learning in reinforcement learning when several  
2 state representations (mapping histories to a discrete state space) are available to  
3 the learning agent. At least one of these representations is assumed to induce a  
4 Markov decision process (MDP), and the performance of the agent is measured in  
5 terms of cumulative regret against the optimal policy giving the highest average  
6 reward in this MDP representation. We propose an algorithm (UCB-MS) with  
7  $\tilde{O}(\sqrt{T})$  regret in any communicating MDP. The regret bound shows that UCB-MS  
8 automatically adapts to the Markov model and improves over the currently known  
9 best bound of order  $\tilde{O}(T^{2/3})$ .

## 10 1 Introduction

11 In Reinforcement Learning (RL), an agent aims to learn a task while interacting with an unknown  
12 environment. We consider online learning (i.e., non-episodic) problems where the agent has to trade  
13 off the *exploration* needed to collect information about rewards and dynamics and the *exploitation*  
14 of the information gathered so far. In this setting, it is commonly assumed that the agent knows  
15 a suitable *state representation* which makes the process on the state space Markovian. However,  
16 designing such a representation is often highly non-trivial since many “reasonable” representations  
17 may lead to non-Markovian models.

18 The task of selecting or designing a (suitable and compact) state representation of a dynamical  
19 system is a well-known problem in engineering, especially in robotics. This setting has received a  
20 lot of attention in recent years due to the growing number of applications using images or videos  
21 as observations [e.g., 1, 2, 3]. It is possible to come up with different approaches for extracting  
22 features from such high-dimensional observation spaces, but not all of them describe the problem  
23 well or exhibit Markovian dynamics. Additionally, the Markovian assumption that transitions and  
24 rewards are independent of history is often violated in real-world applications where there is often  
25 a dependence on the last  $k > 1$  observations. To deal with this scenario Markov models have been  
26 extended from first-order models to  $k$ th-order models. The problem of selecting the right order of the  
27 model falls into the problem of selecting the correct state representation. In both cases, the goal is to  
28 perform as well as when the true order or compact features of the Markov model are known. For  
29 more details and further examples we refer to [4, 5, 6].

30 We consider the following setting that was introduced by Hutter [7], where it was called *feature*  
31 *reinforcement learning*. The agent is provided with a finite set  $\Phi$  of representations mapping histories  
32 (sequences of actions, observations, and rewards) to a *finite* set of states, such that at least one  
33 model  $\phi^\circ \in \Phi$  induces a Markov Decision Process (MDP) [8]. The goal of the agent is to learn to  
34 solve the task under the appropriate representation. The ability of testing and quickly discarding  
35 non-Markovian representations (not compatible with the observed dynamics) is fundamental for  
36 learning efficiently. This efficiency is measured in terms of cumulative *regret*, which compares the

reward collected by the learner to the one of an agent knowing the Markovian representation and playing the associated optimal policy (i.e. giving the highest average reward).

This problem was initially studied by Maillard et al. [4]. Given a finite set of representations  $\Phi$ , after  $T$  steps the regret of the Best Lower Bound (BLB) algorithm w.r.t. any optimal policy associated to a Markov model is upper bounded by  $\tilde{O}(\sqrt{|\Phi|T^{2/3}})$ . The BLB algorithm is based on random exploration of the models and uses properties of UCRL2 [9] —an efficient algorithm for exploration-exploitation in communicating MDPs— to control the amount of time spent in non-Markovian models. BLB requires to estimate the diameter [9] of the true MDP, which leads to an additional additive term in the regret bound that may be exponential in the true diameter. BLB was successively extended by Nguyen et al. [6] to the case of countably infinite set of models. The suggested IBLB algorithm removes the guessing of the diameter —thus avoiding the additional exponential term in the regret— but its regret bound is still of order  $T^{2/3}$ . The Optimistic Model Selection (OMS) algorithm [5] claimed a regret bound of  $\tilde{O}(\sqrt{|\Phi|T})$ , thus matching the optimal dependence in terms of  $T$ . However, algorithm and analysis were based on the REGAL.D algorithm [10], and recently it has been pointed out, that the proof of the regret bound for REGAL.D contains a mistake that invalidates also the result for OMS, see App. A of [11]. Accordingly, it still has been an open question whether it is possible to achieve regret bounds of order  $\sqrt{T}$  in the considered setting.

In this paper we introduce UCB-MS, an optimistic elimination algorithm that performs efficient exploration of the representations. For this algorithm we prove a regret bound of order  $\tilde{O}(\sqrt{|\Phi|T})$ . Our algorithm as well as our results are based on and generalize the regret bounds achieved for the UCRL2 algorithm in [9]. In particular, if  $\Phi$  consists of a single Markov model we obtain the same regret bound as for UCRL2. UCB-MS employs optimism to choose a model from  $\Phi$ . To avoid suffering too large regret from choosing a non-Markov model, the collected rewards are compared to regret bounds that are known to hold for Markov models. If a model fails to give sufficiently high reward, it is eliminated. On the other hand, UCB-MS is happy to employ a non-Markov model as long as it gives as much reward as it would be expected from a corresponding Markov model.

While UCB-MS shares some basic ideas with BLB and OMS, it is simpler than OMS, however recovers the same regret bounds that have been claimed for OMS. As BLB, UCB-MS has to guess the diameter, however the guessing scheme we employ comes at little cost w.r.t. regret and in particular does not give any additive constants in the bounds that are exponential in the diameter. We also show how to modify the guessing scheme to guess diameter and the size of the state space of the Markov model  $\phi^\circ$  at the same time. Last but not least, we introduce the notion of the *effective size*  $S_\Phi$  of the state space induced by the model set  $\Phi$  and give regret bounds that depend on  $S_\Phi$ , which gives improved bounds, e.g. for hierarchical models.

**Overview.** We start with describing the learning setting in full detail in the following section. In Section 3, we give some preliminaries concerning the UCRL2 algorithm. Our UCB-MS algorithm is introduced in Section 4 where we also give the regret analysis in case the diameter of the underlying Markov model is known. The following Section 5 shows how to guess the diameter otherwise. Section 6 gives some further improvements and also introduces the notion of effective state space.

## 2 Setting

The details of the considered learning setting are as follows. At each time step  $t = 1, 2, \dots$ , the learner receives an initial observation  $o_t$  and has to choose an action  $a_t$  from a finite set of actions  $\mathcal{A}$ . In return, the learner receives a reward  $r_t$  taken from  $\mathcal{R} = [0, 1]$  and the next observation  $o_{t+1}$ .

We denote by  $\mathcal{O}$  the set of observations and define the history  $h_t$  up to step  $t$  as the sequence  $o_1, a_1, r_1, o_2, \dots, a_t, r_t, o_{t+1}$  of observations, actions and rewards. The set  $\mathcal{H}_t := \mathcal{O} \times (\mathcal{A} \times \mathcal{R} \times \mathcal{O})^{t-1}$  contains all possible histories up to step  $t$  and we set  $\mathcal{H} := \bigcup_{t \geq 1} \mathcal{H}_t$  to be the set of all possible histories.

### 2.1 Models and MDPs

A *state-representation model* (in the following short: *model*)  $\phi$  is a function that maps histories to states, that is,  $\phi : \mathcal{H} \rightarrow \mathcal{S}_\phi$ . If a model  $\phi$  induces a *Markov decision process (MDP)* we call it a *Markov model*. An MDP has the Markov property that any time  $t$ , the probability of reward  $r_t$  and next state  $s_{t+1} = \phi(h_{t+1})$ , given the past history  $h_t$ , only depends on the current state  $s_t = \phi(h_t)$

89 and the chosen action  $a_t$ , i.e.,  $P(s_{t+1}, r_t | h_t, a_t) = P(s_{t+1}, r_t | s_t, a_t)$ . We assume that for MDPs this  
 90 probability is also independent of  $t$ .

91 Usually an MDP  $M$  is denoted as a tuple  $M = (\mathcal{S}_\phi, \mathcal{A}, r, p)$ , where  $r(s, a)$  is the mean reward and  
 92  $p(s' | s, a)$  the probability of a transition to state  $s' \in \mathcal{S}_\phi$  when choosing action  $a \in \mathcal{A}$  in state  $s \in \mathcal{S}_\phi$ .  
 93 If  $\phi$  is a Markov model, we write the induced MDP as  $M(\phi)$ .

94 MDPs are called *communicating* if for any two states  $s, s'$  it is possible to reach  $s'$  from  $s$  with  
 95 positive probability by choosing appropriate actions. The smallest expected time it takes to connect  
 96 any two states is called the *diameter*  $D$  of the MDP, cf. [9]. In communicating MDPs, the optimal  
 97 average reward  $\rho^*$  is independent of the initial state and will be achieved by a stationary deterministic  
 98 policy  $\pi^* \in \Pi^{\text{SD}}$  that maps states to actions. For a Markov model  $\phi$ , the diameter and the optimal  
 99 average reward of the induced MDP will be denoted as  $D(\phi)$  and  $\rho^*(\phi)$ , respectively.

## 100 2.2 Problem setting

101 The learning setting we consider is the following. As already described before, the learner chooses  
 102 actions  $a_t$  and obtains a reward  $r_t$  and an observation  $o_{t+1}$  in return. We assume that the learner has  
 103 a finite set  $\Phi$  of models at her disposal and at least one model  $\phi^\circ$  in  $\Phi$  is a Markov model. The goal is  
 104 to provide algorithms that perform well with respect to the optimal policy  $\pi^*$  in the MDP  $M(\phi^\circ)$ ,  
 105 that is, the optimal strategy when the Markov model and the induced underlying MDP are completely  
 106 known. Accordingly, the performance of a learning algorithm will be measured by considering its  
 107 *regret* after any  $T$  steps defined as (cf. [9, 10, 4])

$$T\rho^*(\phi^\circ) - \sum_{t=1}^T r_t,$$

108 where  $r_t$  is the reward received by the learning algorithm at step  $t$ .

## 109 3 UCRL2 Preliminaries

110 The algorithm we propose is based on the UCRL2 algorithm of [9]. Thus, in this section we give  
 111 some preliminaries concerning the UCRL2 algorithm.

112 UCRL2 is an algorithm that generalizes the *optimism in the face of uncertainty* idea of UCB [12]  
 113 from the bandit setting to reinforcement learning in MDPs. The algorithm maintains estimates of  
 114 rewards and transition probabilities and respective confidence intervals that make up a set of plausible  
 115 MDPs  $\mathcal{M}$ .

116 That is, acting in an unknown MDP, UCRL2 maintains estimates  $\hat{r}(s, a)$  and  $\hat{p}(\cdot | s, a)$  of rewards and  
 117 transition probabilities, respectively. The set  $\mathcal{M}_t$  of plausible MDPs at step  $t$  contains all MDPs with  
 118 rewards  $\tilde{r}(s, a)$  and  $\tilde{p}(\cdot | s, a)$  and transition probabilities satisfying<sup>1</sup>

$$|\hat{r}(s, a) - \tilde{r}(s, a)| \leq \sqrt{\frac{7 \log(4SA t^3 / \delta)}{2N(s, a)}}, \quad (1)$$

$$\|\hat{p}(\cdot | s, a) - \tilde{p}(\cdot | s, a)\|_1 \leq \sqrt{\frac{14S \log(4At^3 / \delta)}{2N(s, a)}}, \quad (2)$$

119 where  $N(s, a)$  denotes the number of times  $a$  has been chosen in  $s$  (and is set to 1, if  $a$  has not been  
 120 chosen in  $s$  so far). The true MDP  $M$  is in  $\mathcal{M}$  with high probability.

121 **Lemma 1** (Lemma 17 in the appendix of [9]<sup>2</sup>). *With probability at least  $1 - \frac{\delta}{30t^8}$ , at step  $t$  the true*  
 122 *MDP  $M$  is contained in the set  $\mathcal{M}_t$ .*

123 The UCRL2 algorithm proceeds in episodes  $k = 1, 2, \dots$ . In each episode  $k$  starting at step  $t_k$   
 124 the algorithm plays a fixed policy  $\tilde{\pi}_k$ , which is chosen to maximize the optimal average reward in  
 125  $\mathcal{M}_k := \mathcal{M}_{t_k}$ . That is, writing  $\rho(\pi, M)$  for the average reward of policy  $\pi$  in MDP  $M$  we have  
 126  $\tilde{\rho}_k := \max_{\pi, M \in \mathcal{M}_k} \rho(\pi, M) = \rho(\tilde{\pi}_k, \tilde{M}_k)$ , where  $\tilde{M}_k$  is an optimistic MDP chosen from  $\mathcal{M}_k$  to  
 127 maximize  $\tilde{\rho}_k$ . As the true MDP  $M$  is in  $\mathcal{M}_k$  with high probability, we also have that  $\tilde{\rho}_k \geq \rho^*$ .

<sup>1</sup>The confidence intervals shown here are the ones we use in the following and slightly differ from the  
 confidence intervals given for UCRL2 in [9]. That is, the confidence  $\delta$  of the original values is replaced by  $\delta/2t^2$   
 to guarantee smaller error probability, which is needed in our analysis.

<sup>2</sup>As noted before, the error probability  $\delta$  has been changed from  $\delta$  to  $\delta/2t^2$  here.

Let  $v_k(s, a)$  denote the number of times  $a$  has been chosen in  $s$  in episode  $k$ , while  $N_k(s, a)$  denotes the number of times  $a$  has been chosen in  $s$  before episode  $k$  (i.e., in episodes 1 to  $k - 1$ ). If there were no visits in  $(s, a)$  before episode  $k$ , then  $N_k(s, a)$  is set to 1. Episode  $k$  is terminated by UCRL2 when a state  $s$  is reached in which  $v_k(s, \pi_k(s)) = N_k(s, \pi_k(s))$ .

Let  $S = |\mathcal{S}|$  be the size of the state space,  $A = |\mathcal{A}|$  the size of the action space, and  $D$  be the diameter of the MDP. Then, one can show the following upper bound on the regret of UCRL2.

**Theorem 2** (Theorem 2 of [9]). *With probability  $1 - \delta$  the regret of UCRL2 after any  $T$  steps is bounded by*

$$34DS\sqrt{AT \log\left(\frac{2T^3}{\delta}\right)}.$$

The bound is based on an episode-wise decomposition of the regret, which we will use for our algorithm. Let  $T_k$  be the (current) length of episode  $k$ . In the following, we abuse notation for  $T_k$  as well as for  $v_k(s, a)$  by using the same notation for the number of steps in a terminated episode as well as for the current number of steps in an ongoing episode. Further, recall that  $t_k$  denotes the time step when episode  $k$  starts. The regret of UCRL2 in any episode  $k$  is bounded as follows.<sup>3</sup>

**Lemma 3.** *Consider an arbitrary episode  $k$  started at step  $t_k$ . With probability  $1 - \frac{\delta}{2t_k^2}$ , the regret of UCRL2 at each step  $T_k$  in this episode is bounded by*

$$\left(2D\sqrt{14S \log\left(\frac{16t_k^3}{\delta}\right)} + 2\right) \sum_{s,a} \frac{v_k(s,a)}{\sqrt{N_k(s,a)}} + 2D\sqrt{5T_k \log\left(\frac{16t_k^2 T_k}{\delta}\right)} + D.$$

## 4 The UCB-MS Algorithm

Now let us turn to the state representation learning setting introduced in Section 2. We start with the simpler case when an upper bound  $\bar{D}$  on the diameter  $D := D(\phi^\circ)$  of the Markov model  $\phi^\circ$  is known (i.e.,  $\bar{D} \geq D$ ). The case when no bound on the diameter is known is dealt with in Section 5.

The UCB-MS algorithm we propose (shown as Alg. 1) basically performs the policy computation of UCRL2 for each model  $\phi$ . That is, in episodes  $k = 1, 2, \dots$ , UCB-MS constructs for each state representation  $\phi \in \Phi$  a set of plausible MDPs  $\mathcal{M}_{k,\phi}$  and computes the optimistic average reward

$$\tilde{\rho}_{k,\phi} = \operatorname{argmax}_{\pi \in \Pi^{\text{SD}}, M \in \mathcal{M}_{k,\phi}} \{\rho(\pi, M)\}. \quad (3)$$

This problem can be solved using Extended Value Iteration (EVI) [9] up to an arbitrary accuracy.<sup>4</sup> Among all the models, UCB-MS selects the one with highest average reward (i.e.,  $\phi_k := \operatorname{argmax}_{\phi \in \Phi} \{\tilde{\rho}_{k,\phi}\}$ ). The associated optimistic policy  $\tilde{\pi}_{k,\phi_k}$  is executed until the number of visits is doubled in at least one state-action pair (UCRL2 stopping condition) or this policy does not provide sufficiently high average reward (see Eq. 6), in which case the model  $\phi_k$  is eliminated.

The function  $\Gamma_t$  in Eq. (6) defines the allowed deviation from the promised optimistic average reward  $\tilde{\rho}_k := \tilde{\rho}_{k,\phi_k}$ . We define  $\Gamma_t$ , according to Lemma 3, as

$$\Gamma_t(D) := \left(2D\sqrt{14S_{\phi_t} \log\left(\frac{16t_{k(t)}^3}{\delta}\right)} + 2\right) \sum_{s,a} \frac{v_{k(t)}(s,a)}{\sqrt{N_{k(t)}(s,a)}} + 2D\sqrt{5T_{k(t)} \log\left(\frac{16t_{k(t)}^2 T_{k(t)}}{\delta}\right)} + D, \quad (4)$$

where  $k(t)$  denotes the episode in which step  $t$  occurs. In Eq. 6 we exploit the prior knowledge  $\bar{D} \geq D$  in order to properly define the condition for model elimination. We will see below in Section 5 that it is easy to adapt the algorithm to the case of unknown diameter.

If the set  $\Phi$  consists only of a single Markov model, basically UCB-MS coincides with UCRL with an additional checking step that will result in discarding the single model only with small probability. Note that UCB-MS shares the optimistic model selection and the idea of eliminating underachieving models with OMS, however its structure is much simpler.

Concerning the computational complexity of our algorithm, note that the EVI subroutine we use for policy computation works just as ordinary value iteration with the same convergence properties

<sup>3</sup>The bound in Lemma 3 is not explicitly stated for single episodes in [9] but easily follows from equations (8), (9), (15)–(17), and the argument given before equation (18), choosing confidence  $\delta/t^2$  instead of  $\delta$ .

<sup>4</sup>As for UCRL2, we set the accuracy in episode  $k$  to be  $1/\sqrt{t_k}$ .

---

**Algorithm 1** UCB-Model Selection (UCB-MS)

---

**Input:** set of models  $\Phi$ , confidence parameter  $\delta \in (0, 1)$ , upper bound  $\bar{D}$  on diameter

**Initialization:** Let  $t := 1$  be the current time step.

**for** episodes  $k = 1, 2, \dots$  **do**

Let  $t_k := t$  be the initial step of the current episode  $k$ .

▷ For each  $\phi \in \Phi$ , use Extended Value Iteration (EVI) to compute an optimistic MDP  $\widetilde{M}_k(\phi)$  in  $\mathcal{M}_{t,\phi}$  (the set of *plausible* MDPs defined via the confidence intervals (1) and (2) for the estimates so far), a (near-)optimal policy  $\widetilde{\pi}_{k,\phi}$  on  $\widetilde{M}_{t,\phi}$  with approximate average reward  $\widetilde{\rho}_{t,\phi}$ .

▷ Choose model  $\phi_k \in \Phi$  such that

$$\phi_k = \operatorname{argmax}_{\phi \in \Phi} \{ \widetilde{\rho}_{t,\phi} \}, \quad (5)$$

and set  $\widetilde{\rho}_k := \rho_{t,\phi_k}$ ,  $\widetilde{\pi}_k := \widetilde{\pi}_{t,\phi_k}$ , and  $S_k := S_{\phi_k}$ .

▷ Repeat till termination of the current episode  $k$ :

- Choose action  $a_t := \pi_k(s_t)$ , get reward  $r_t$  and observe next state  $s_{t+1} \in S_k$
- Set  $t := t + 1$ .
- **if**  $v_k(s_t, a_t) = N_{t_k}(s_t, a_t)$  **then** terminate current episode.
- **if**

$$(t - t_k + 1)\widetilde{\rho}_k - \sum_{\tau=t_k}^t r_\tau > \Gamma_t(\bar{D}) \quad (6)$$

**then** set  $\Phi := \Phi \setminus \{\phi_k\}$  and terminate current episode.

**end for**

---

166 and the same computational complexity with an additional overhead of  $O(|S|^2|A|)$  per iteration step,  
167 cf. [9]. Policy is computed for each model  $\phi$  at most  $|\Phi| + S_\phi A \log T$  times, cf. Lemma 5 (c) below.

168 Our first result is the following regret bound for UCB-MS. Here  $S_{\max} := \max_\phi S_\phi$  denotes the size  
169 of state space of the largest model and  $S_\Sigma := \sum_\phi S_\phi$  the size of the total state space over all models.

170 **Theorem 4.** *With probability  $1 - \delta$ , the regret of UCB-MS using  $\bar{D} \geq D$  is bounded by*

$$\text{const} \cdot \bar{D} \sqrt{S_{\max} S_\Sigma A T \log \left( \frac{T}{\delta} \right)}.$$

171 Note that the bound of Theorem 4 holds for any Markov model in  $\Phi$ . Thus, in case there is a Markov  
172 model with smaller state space the regret bound shows that UCB-MS automatically adapts to this  
173 preferable model. When  $\Phi$  consists of a single Markov model we re-establish the bounds for UCRL2  
174 (up to the prior knowledge). Most importantly, the bound of Theorem 4 improves over the currently  
175 best known bound for BLB, which is of order  $\widetilde{O}(T^{2/3})$ . If all models induce a state space of equal  
176 size  $S$ , the bound in Theorem 4 is  $\widetilde{O}(DS\sqrt{|\Phi|AT})$ , which also improves over the claimed regret  
177 bound of OMS, which is of order  $\widetilde{O}(DS^{3/2}A\sqrt{|\Phi|T})$ . We note however that in other cases the state  
178 space dependence of the OMS bound may be better. In Section 6 below we show how to regain the  
179 OMS bound for our algorithm and how in some cases (like for hierarchical models) the dependence  
180 on  $S_\Sigma$  can be replaced by the smaller *effective* size of the state space.

#### 181 4.1 Analysis (Proof of Theorem 4)

182 The following lemma collects some basic facts about UCB-MS.

183 **Lemma 5.** *With probability  $1 - \delta$ , all of the following statements hold:*

184 (a) *The confidence intervals (1) and (2) of the Markov model  $\phi^\circ$  hold for all time steps  $t = 1, \dots, T$ .*

185 (b) *No Markov models are discarded in (6).*

186 (c) *The number of episodes of UCB-MS is bounded by  $|\Phi| + S_\Sigma A \log T$ .*

187 *Proof.* (a) follows from Lemma 1 by summing over the error probabilities giving an error probability  
188 of  $\sum_t \frac{\delta}{30t^8} < \frac{\delta}{6}$ .

189 For (b), if UCB-MS chooses a Markov model, then the regret in the respective episode is bounded  
 190 according to Lemma 3. The sum over the respective error probabilities  $\delta/2t_k^2$  over all episodes is  
 191 bounded by  $\frac{5\delta}{6}$ , which proves (b).

192 If (b) holds, then there are at most  $|\Phi| - 1$  episodes in which a model is discarded. For episodes which  
 193 are terminated by doubling the number of visits, we can use Proposition 18 of [9], as the episode  
 194 termination criterion of UCB-MS is the same as for UCRL2. Since we have to take into account all  
 195 states of all models, the size of the state space to be considered is the sum over the sizes of the state  
 196 spaces of the individual models.  $\square$

197 The bound on the number of episodes in the worst case depends on  $S_\Sigma$ . Under some assumptions on  
 198 the given models in  $\Phi$  (like having hierarchical models) this can be reduced, see Section 6 for details.

199 *Proof of Theorem 4.* We assume that the statements of Lemma 5 all hold, which is the case with  
 200 probability  $1 - \delta$ . Let  $\phi^\circ$  be a Markov model in  $\Phi$  and consider any episode  $k$ . By Lemma 5 (a),  
 201 the optimistic estimate  $\tilde{\rho}_{t_k, \phi^\circ} \geq \rho^*(\phi^\circ)$ . By the optimism of the algorithm we further have that  
 202  $\tilde{\rho}_k \geq \tilde{\rho}_{t_k, \phi^\circ}$ . Hence, the regret  $\Delta_k$  in each episode  $k$  is bounded by

$$\Delta_k := T_k \cdot \rho^*(\phi^\circ) - \sum_{\tau=t_k}^{t_k+T_k} r_\tau \leq T_k \cdot \rho_k - \sum_{\tau=t_k}^{t_k+T_k} r_\tau.$$

203 By the definition of the algorithm, condition (6) does not hold at least up to the final step of the  
 204 episode, so that we obtain that (as rewards are upper bounded by 1)

$$\Delta_k \leq \Gamma_{t_k}(\bar{D}) + 1.$$

205 Using the definition of  $\Gamma_t(\bar{D})$  (see (4)) and writing  $K$  for the total number of episodes, we obtain for  
 206 the total regret summing over all episodes a bound of

$$\begin{aligned} \sum_k \Delta_k &\leq \sum_k (\Gamma_{t_k}(\bar{D}) + 1) \\ &\leq \left( 2\bar{D} \sqrt{14S_{\max} \log\left(\frac{16T^3}{\delta}\right)} + 2 \right) \sum_k \sum_{s,a} \frac{v_k(s,a)}{\sqrt{N_k(s,a)}} + 2\bar{D} \sqrt{5 \log\left(\frac{16T^3}{\delta}\right)} \sum_k \sqrt{T_k} + K\bar{D}. \end{aligned}$$

207 As for the analysis of UCRL2, we have that (cf. Eq. 20 of [9])

$$\sum_k \sum_{s,a} \frac{v_k(s,a)}{\sqrt{N_k(s,a)}} \leq (\sqrt{2} + 1) \sqrt{S_\Sigma AT}.$$

208 Using that  $\sum_k T_k = T$  together with Jensen's inequality, we obtain  $\sqrt{T_k} \leq \sqrt{KT}$ . Summarizing  
 209 we obtain using the bounds on the number of episodes of Lemma 5 (c) after some simplifications and  
 210 noting that  $|\Phi| \leq S_\Sigma$  a regret bound of

$$\text{const}_1 \cdot D \sqrt{S_{\max} S_\Sigma AT \log\left(\frac{T}{\delta}\right)} + \text{const}_2 \cdot D \sqrt{S_\Sigma AT (\log T) \left(\log \frac{T}{\delta}\right)} + \text{const}_3 \cdot DS_\Sigma A \log T,$$

211 which completes the proof of the theorem.  $\square$

## 212 5 Unknown Diameter

213 If the diameter is unknown we suggest the following guessing scheme. We run UCB-MS with some  
 214 initial value  $\bar{D} \geq 1$ . If at some step *all models have been eliminated* then double the value of  $\bar{D}$  and  
 215 restart the algorithm, that is, start a new episode now *considering all models again*.

216 One can show that the regret of this doubling scheme is basically bounded as before unless  $D$  is very  
 217 large compared to  $T$ .

218 **Theorem 6.** *With probability  $1 - \delta$ , the regret of UCB-MS guessing  $D$  by doubling is bounded by*

$$\text{const} \cdot D \sqrt{(S_{\max} S_\Sigma A + |\Phi| \log D) T \log\left(\frac{T}{\delta}\right)}.$$

219 *Proof.* Let  $D_k$  denote the parameter  $\bar{D}$  used in episode  $k$  (estimate of  $D$ ). As in the proof of  
 220 Theorem 4 we have that a Markov model will not be eliminated with high probability once  $D_k \geq D$ .

221 Hence, in total there cannot be more than  $\lceil |\Phi| \log_2 D \rceil$  episodes that are terminated by discarding a  
 222 model.

223 Let  $\Gamma_t(D)$  be defined as in (4). Then the same argument as in the proof of Theorem 4 shows that the  
 224 regret in each episode  $k$  is bounded by  $\Gamma_{t_k}(D_k) + 1$ .

225 The rest of the proof can be rewritten from Theorem 4 using that  $D_k < 2D$  for all  $k$  with high  
 226 probability. The only difference is that the bound on the number of episodes has an additional term of  
 227  $\lceil |\Phi| \log_2 D \rceil$ , so that one obtains a regret bound of

$$\begin{aligned} & \text{const}_1 \cdot D \sqrt{S_{\max} S_{\Sigma} A T \log \left( \frac{T}{\delta} \right)} + \text{const}_2 \cdot D \sqrt{\left( S_{\Sigma} A (\log T) + |\Phi| \log D \right) T \log \frac{T}{\delta}} + \\ & \text{const}_3 \cdot (D S_{\Sigma} A + |\Phi| \log D) \log T. \end{aligned}$$

228 Summarizing the terms gives the claimed bound.  $\square$

229 Theorem 6 shows that the cost of the guessing scheme is little w.r.t. the regret and, in particular, does  
 230 not result in any additive constant in the bound that is exponential in the diameter (in contrast to  
 231 BLB). Thus, the improvements over OMS discussed after Theorem 4 hold also for UCB-MS with  
 232 guessing the diameter.

## 233 6 Improving the Bounds

### 234 6.1 Improving on the Number of Episodes

235 The regret bounds we obtain for UCB-MS are basically of the same order as for standard reinforcement  
 236 learning in MDPs (i.e. with a given Markov model) as achieved e.g. by [9]. However, the state space  
 237 dependence seems not completely satisfactory, as the bounds do not only depend on the state space  
 238 size of the Markov model, but on the total state space size  $S_{\Sigma}$  over all models.

239 The appearance of the parameter  $S_{\Sigma}$  in the bounds is due to the bound on the number of episodes  
 240 in Lemma 5 (c). In the worst case, this bound cannot be improved. That is, without any further  
 241 assumptions on the way models in  $\Phi$  aggregate histories one cannot say how visits in a state under  
 242 some model  $\phi$  translate into state visits under some other model  $\phi'$ . For example, when under some  
 243 model  $\phi$  all states have been visited so far, the respective histories may be mapped to just a single  
 244 state under some other model  $\phi'$ . Consequently, one basically has to assume that the states of different  
 245 models  $\phi, \phi'$  are completely independent of each other, which leads to the bound of Lemma 5 (c).

246 However, if there is some particular structure on the set of given models  $\Phi$ , the bound on the number  
 247 of episodes can be improved to not depend on the total number of states  $S_{\Sigma}$ .

248 **Definition 7.** Let  $\Phi$  be a set of state representation models. We define the effective size  $S_{\Phi}$  of the  
 249 state space of  $\Phi$  to be the number of states that are sufficient to cover all states under  $\Phi$  in the sense  
 250 that visits in all  $S_{\Phi}$  covering states induce visits in all other states.

251 A simple example is when models are hierarchical. That is, there is some model  $\phi$  in  $\Phi$ , such that all  
 252 other models  $\phi'$  aggregate the states of  $\phi$ , i.e., it holds that if  $\phi(h) = \phi(h')$  then  $\phi'(h) = \phi'(h')$  for  
 253 all histories  $h, h'$  in  $\mathcal{H}$ . In this case,  $S_{\Phi} = S_{\phi}$ . Note that when considering different orders for an  
 254 MDP, this also results in a hierarchical model set.

255 In general, we obviously have that  $S_{\Phi} \leq S_{\Sigma}$  and the bound on the number of episodes of Lemma 5 (c)  
 256 can be improved to depend on  $S_{\Phi}$  instead of  $S_{\Sigma}$  (with the same proof).

257 **Lemma 8.** The number of episodes of UCB-MS terminated by the doubling criterion is bounded by  
 258  $S_{\Phi} A \log T$ .

259 Accordingly, we can strengthen the results of Theorems 4 and 6 as follows.

260 **Theorem 9.** The regret bounds of Theorems 4 and 6 hold with  $S_{\Sigma}$  replaced by  $S_{\Phi}$ .

### 261 6.2 Improving Further on the State Space Dependence

262 Even after adjusting the size of the state space, there is still room for improvement of the bounds with  
 263 respect to the size of the state space. In principle, one would like to have a dependence on the size of  
 264 the state space of the Markov model  $\phi^{\circ}$ . As we have seen, with the current analysis the dependence  
 265 on the effective number of states  $S_{\Phi}$  is unavoidable. However, the second appearing state space

term  $S_{\max}$  can be improved by guessing the right size of the state space (i.e.,  $S_{\phi^\circ}$ ). We distinguish between two cases, depending on whether a bound on the diameter is known.

### 6.2.1 Diameter Known

If there is a known bound on the diameter, we can adapt the guessing scheme for the diameter to the state space. That is, starting with  $S := 1$  or  $S := \min_{\phi} S_{\phi}$  we compare the collected rewards to the optimistic average reward  $\tilde{\rho}_k$  of the current episode  $k$ , as before eliminating underachieving models. As comparison term we choose now (in accordance with the regret bound for UCRL2 in Theorem 2)

$$\Gamma_t(S) := 34DS\sqrt{A(t - t_k + 1)\log\left(\frac{2t^3}{\delta}\right)}. \quad (7)$$

For this guessing scheme one can show the following regret bound (proof in Appendix A.1).

**Theorem 10.** *With probability  $1 - \delta$ , the regret of UCB-MS guessing  $S$  by doubling is bounded by*

$$\text{const} \cdot DS_{\phi^\circ} \sqrt{(S_{\Phi} A \log T + |\Phi| \log S_{\phi^\circ}) AT \log\left(\frac{T}{\delta}\right)}.$$

We see that replacing  $S_{\max}$  with  $S_{\phi^\circ}$  comes at a cost of worse dependence on the number of states and actions, as the summing over episodes in the proof has to be done differently. Still, if  $S_{\max}$  is quite large, the bound of Theorem 10 can be an improvement over the previously presented bounds.

### 6.2.2 Unknown Diameter

If the diameter is not known, one can do the guessing for both  $D$  and  $S$  at the same time. More precisely, in the comparison term one does not guess  $D$  and  $S$  separately but the factor  $DS$  instead. That is, one starts with setting  $\widetilde{DS} := 1$  or some other fixed value like  $\widetilde{DS} := \min_{\phi} S_{\phi}$  and defines the comparison term as

$$\Gamma_t(\widetilde{DS}) := 34\widetilde{DS}\sqrt{A(t - t_k + 1)\log\left(\frac{2t^3}{\delta}\right)}. \quad (8)$$

This leads to the following regret bound, which basically corresponds to the bound that has been claimed for OMS, only with  $S_{\Sigma}$  replaced by the potentially smaller  $S_{\Phi}$  (proof in Appendix A.2).

**Theorem 11.** *With probability  $1 - \delta$ , the regret of UCB-MS guessing both  $D$  and  $S$  by doubling is bounded by*

$$\text{const} \cdot DS_{\phi^\circ} \sqrt{(S_{\Phi} A \log T + |\Phi| \log(DS_{\phi^\circ})) AT \log\left(\frac{T}{\delta}\right)}.$$

## 7 Discussion

While we have decided to use UCRL2 as reference algorithm for the definition of our UCB-MS strategy, our approach can actually serve as a blueprint for adapting any optimistic algorithm with known regret bounds to the state representation setting considered in this paper. In particular, if the regret bounds for UCRL2 or a variation of it can be improved (this might be possible w.r.t. the parameters  $S$  and  $D$ , cf. [9]) this automatically gives improved bounds for a corresponding variant of UCB-MS.

In [5], it has been tried to use some form of regularization so that models with large state space are less appealing. However, this did not avoid the dependence of the claimed bounds on  $S_{\Sigma}$ . It is an interesting question whether some improved regularization approach can give bounds that do only depend on  $S_{\phi^\circ}$ . In general, the right dependence of regret bounds on the size of the model set  $\Phi$  is also an open problem.

Another question that is still open also for the MDP setting is whether the diameter can be replaced by the *bias span*  $\lambda^*$  of the optimal policy. With an upper bound on  $\lambda^*$ , one could replace UCRL2 by the SCAL algorithm of [13]. However, the guessing scheme we employ for the diameter does not work for SCAL, as chosen policies may not be optimistic anymore, if the guess for  $\lambda^*$  is too small.

Another direction for future research are generalizations to infinite model sets, which for the case of discrete sets has already been done for the BLB algorithm [6]. Parametric sets of models would be an interesting next step from there.

A different question are approximate Markov models as considered in [14], where the assumption that there is a Markov model is dropped. The results given there are also affected by the mentioned error in the proof of the OMS regret bound. We think that our approach can be adapted, however the details still have to be worked out.



## References

- [1] Rico Jonschkowski and Oliver Brock. State representation learning in robotics: Using prior knowledge about physical interaction. In *Robotics: Science and Systems*, 2014.
- [2] Timothée Lesort, Natalia Díaz-Rodríguez, Jean-François Goudou, and David Filliat. State representation learning for control: An overview. *Neural Networks*, 2018.
- [3] Tim de Bruin, Jens Kober, Karl Tuyls, and Robert Babuska. Integrating state representation learning into deep reinforcement learning. *IEEE Robotics and Automation Letters*, 3(3):1394–1401, 2018.
- [4] Odalric-Ambrym Maillard, Rémi Munos, and Daniil Ryabko. Selecting the state-representation in reinforcement learning. In *Advances Neural Processing Systems 24, NIPS 2011*, pages 2627–2635, 2012.
- [5] Odalric-Ambrym Maillard, Phuong Nguyen, Ronald Ortner, and Daniil Ryabko. Optimal regret bounds for selecting the state representation in reinforcement learning. In *JMLR Workshop and Conference Proceedings Volume 28: Proceedings of The 30th International Conference on Machine Learning*, pages 543 – 551, 2013.
- [6] Phuong Nguyen, Odalric-Ambrym Maillard, Daniil Ryabko, and Ronald Ortner. Competing with an infinite set of models in reinforcement learning. In *JMLR Workshop and Conference Proceedings Volume 31: Proceedings of the 16th International Conference on Artificial Intelligence and Statistics, AISTATS 2013*, pages 463–471, 2013.
- [7] Marcus Hutter. Feature reinforcement learning: Part I. Unstructured MDPs. *J. Artificial General Intelligence*, 1(1):3–24, 2009.
- [8] Martin L. Puterman. *Markov Decision Processes: Discrete Stochastic Dynamic Programming*. John Wiley & Sons, Inc., New York, NY, USA, 1994.
- [9] Thomas Jaksch, Ronald Ortner, and Peter Auer. Near-optimal regret bounds for reinforcement learning. *J. Mach. Learn. Res.*, 11:1563–1600, 2010.
- [10] Peter L. Bartlett and Ambuj Tewari. REGAL: A regularization based algorithm for reinforcement learning in weakly communicating MDPs. In *Proc. 25th Conference on Uncertainty in Artificial Intelligence, UAI 2009*, pages 25–42, 2009.
- [11] Ronan Fruit, Matteo Pirota, and Alessandro Lazaric. Near optimal exploration-exploitation in non-communicating markov decision processes. In *NeurIPS*, pages 2998–3008, 2018.
- [12] Peter Auer, Nicolò Cesa-Bianchi, and Paul Fischer. Finite-time analysis of the multi-armed bandit problem. *Mach. Learn.*, 47:235–256, 2002.
- [13] Ronan Fruit, Matteo Pirota, Alessandro Lazaric, and Ronald Ortner. Efficient bias-span-constrained exploration-exploitation in reinforcement learning. In *Proceedings of the 35th International Conference on Machine Learning, ICML 2018*, volume 80 of *JMLR Workshop and Conference Proceedings*, pages 1573–1581, 2018.
- [14] Ronald Ortner, Odalric-Ambrym Maillard, and Daniil Ryabko. Selecting near-optimal approximate state representations in reinforcement learning. In *Algorithmic Learning Theory - 25th International Conference, ALT 2014*, pages 140–154, 2014.

## 349 A Proofs

### 350 A.1 Proof of Theorem 10

351 The proof is like that for Theorem 6 only that now  $S$  instead of  $D$  is guessed and the comparison  
 352 term  $\Gamma_t$  is different. That is, any Markov model  $\phi^\circ$  will not be discarded with high probability once  
 353  $S \geq S_{\phi^\circ}$ . Therefore, there will be at most  $\lceil |\Phi| \log_2 S_{\phi^\circ} \rceil$  episodes that are terminated by discarding  
 354 a model.

355 Let  $S_k$  be the guess for the size of the state space in episode  $k$ . Then as in the proofs of Theorems 4  
 356 and 6, the regret in each episode  $k$  can be shown to be bounded by  $\Gamma_{t_k}(S_k) + 1$ . As  $S_k \leq 2S_{\phi^\circ}$ ,  
 357 summing over all  $\leq \lceil |\Phi| \log_2 S_{\phi^\circ} \rceil + S_\Phi A \log T$  episodes, Jensen's inequality gives the claimed  
 358 regret bound.  $\square$

### 359 A.2 Proof of Theorem 11

360 The proof is like that for Theorem 10. There will be at most  $\lceil |\Phi| \log_2(DS_{\phi^\circ}) \rceil$  episodes that are  
 361 terminated by eliminating a model, while the regret in each episode  $k$  is bounded by  $\Gamma_{t_k}(\widetilde{DS_k}) + 1$ ,  
 362 where  $\widetilde{DS_k} \leq 2DS_{\phi^\circ}$  is the guess for episode  $k$ . A sum over the episodes gives the claimed  
 363 bound.  $\square$
